# Supplementary material for: Biosynthetic origin of butyrolactol A, an antifungal polyketide produced by a marine-derived Streptomyces
Source: publisher site journal article supplement (doi:10.3762/bjoc.13.47), 2017-03-08

## Supporting Information

for

# Biosynthetic origin of butyrolactol A, an antifungal polyketide produced by a marine-derived *Streptomyces*

Enjuro Harunari<sup>1</sup>, Hisayuki Komaki<sup>2</sup> and Yasuhiro Igarashi<sup>\*1</sup>

Address: <sup>1</sup>Biotechnology Research Center and Department of Biotechnology, Toyama Prefectural University, 5180 Kurokawa, Imizu, Toyama 939-0398, Japan and <sup>2</sup>Biological Resource Center, National Institute of Technology and Evaluation (NBRC), 2-5-8 Kazusakamatari, Kisarazu, Chiba 292-0818, Japan

E-mail: Yasuhiro Igarashi<sup>\*</sup> - yas@pu-toyama.ac.jp

<sup>\*</sup>Corresponding author

## NMR spectra of <sup>13</sup>C- and <sup>2</sup>H-labeled **1**

### Table of Contents

**Figure S1.** <sup>13</sup>C NMR spectrum of butyrolactol A (**1**) labeled with [1,2-<sup>13</sup>C<sub>2</sub>]acetate (125 MHz, DMSO-*d*<sub>6</sub>)

**Figure S2.** 2D-INADEQUATE spectrum of **1** labeled with [1,2-<sup>13</sup>C<sub>2</sub>]acetate (125 MHz, DMSO-*d*<sub>6</sub>)

**Figure S3.** <sup>13</sup>C NMR spectrum of **1** labeled with [U-<sup>13</sup>C<sub>6</sub>]glucose (125 MHz, DMSO-*d*<sub>6</sub>)

**Figure S4.** 2D-INADEQUATE spectrum of **1** labeled with [U-<sup>13</sup>C<sub>6</sub>]glucose (125 MHz, DMSO-*d*<sub>6</sub>)

**Figure S5.** <sup>13</sup>C NMR spectrum of **1** labeled with [1-<sup>13</sup>C]propionate (125 MHz, DMSO-*d*<sub>6</sub>)

**Figure S6.** <sup>13</sup>C NMR spectrum of **1** labeled with L-[*methyl*-<sup>13</sup>C]methionine (125 MHz, DMSO-*d*<sub>6</sub>)

**Figure S7.** <sup>1</sup>H NMR spectrum of **1** (500 MHz, DMSO-*d*<sub>6</sub>)

**Figure S8.** HRESITOFMS spectrum of **1**

**Figure S1:**  $^{13}\text{C}$  NMR spectrum of butyrolactol A (1) labeled with  $[1,2-^{13}\text{C}_2]$ acetate (125 MHz,  $\text{DMSO-}d_6$ )

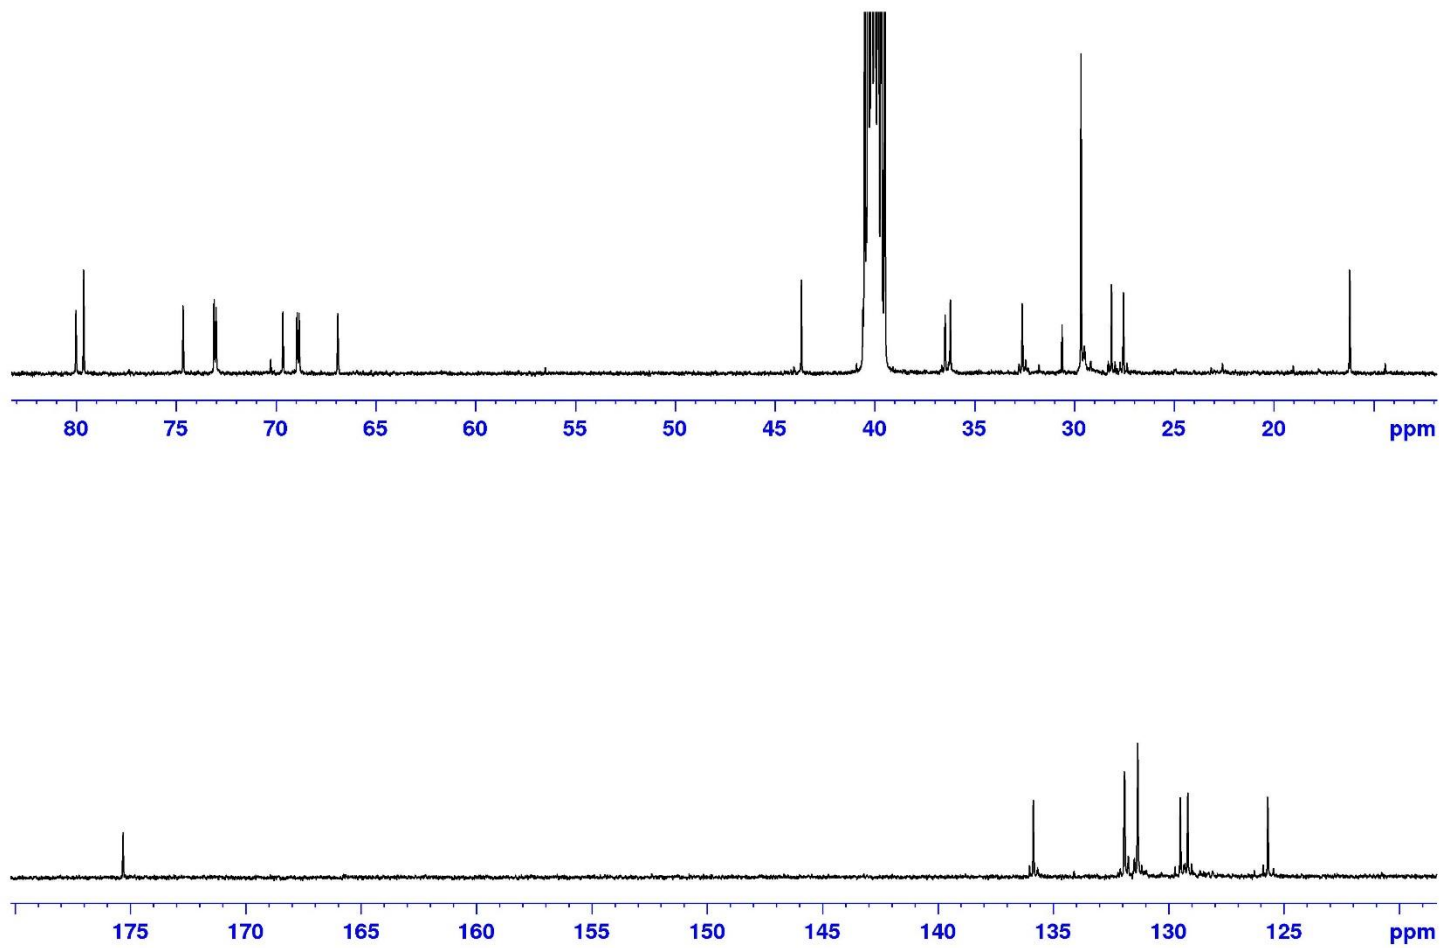

**Figure S2:** 2D-INADEQUATE spectrum of **1** labeled with [1,2-<sup>13</sup>C<sub>2</sub>]acetate (125 MHz, DMSO-*d*<sub>6</sub>)

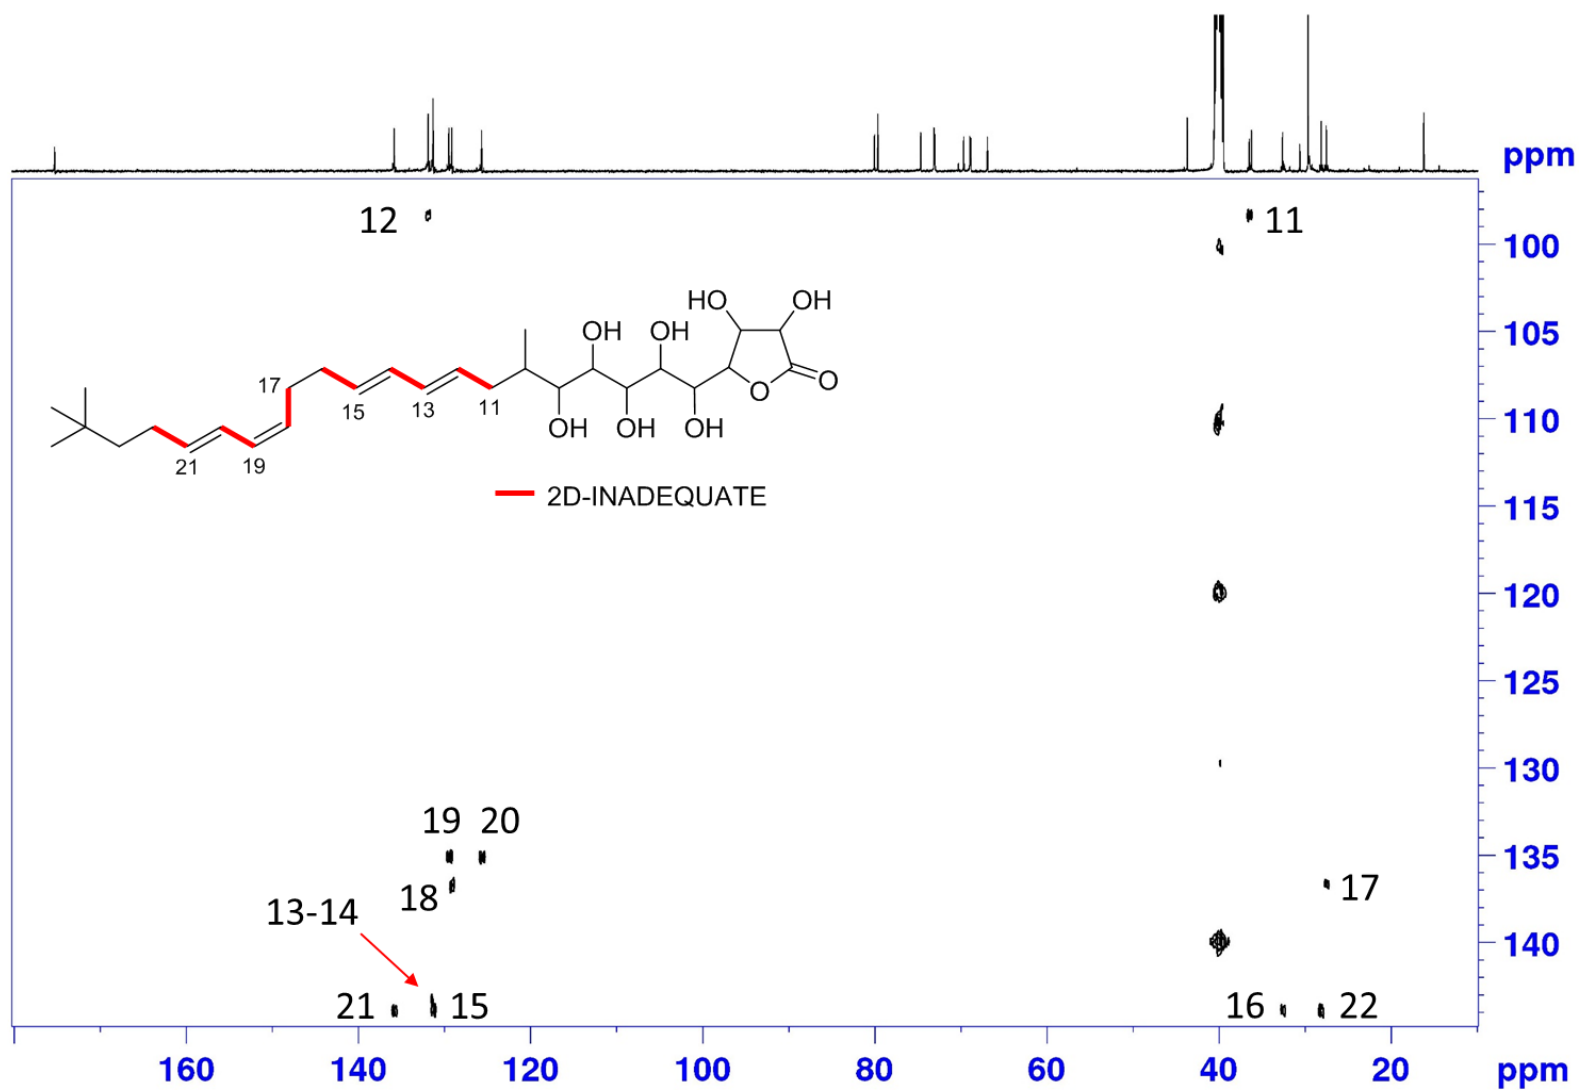

**Figure S3:**  $^{13}\text{C}$  NMR spectrum of **1** labeled with  $[\text{U-}^{13}\text{C}_6]\text{glucose}$  (125 MHz,  $\text{DMSO-}d_6$ )

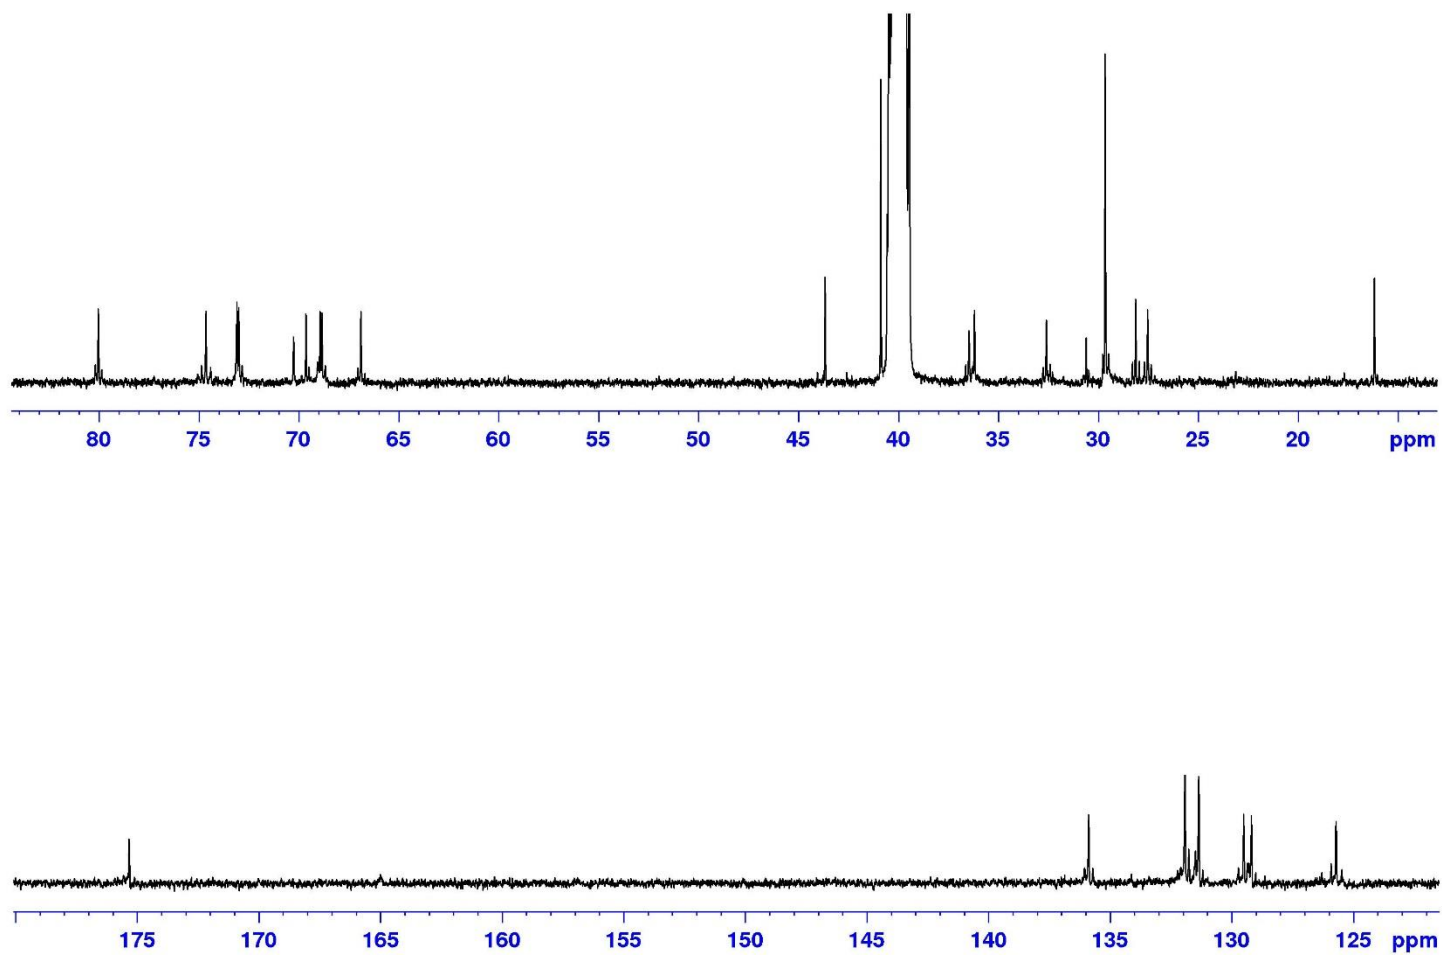

**Figure S4:** 2D-INADEQUATE spectrum of **1** labeled with [U-<sup>13</sup>C<sub>6</sub>]glucose (125 MHz, DMSO-*d*<sub>6</sub>)

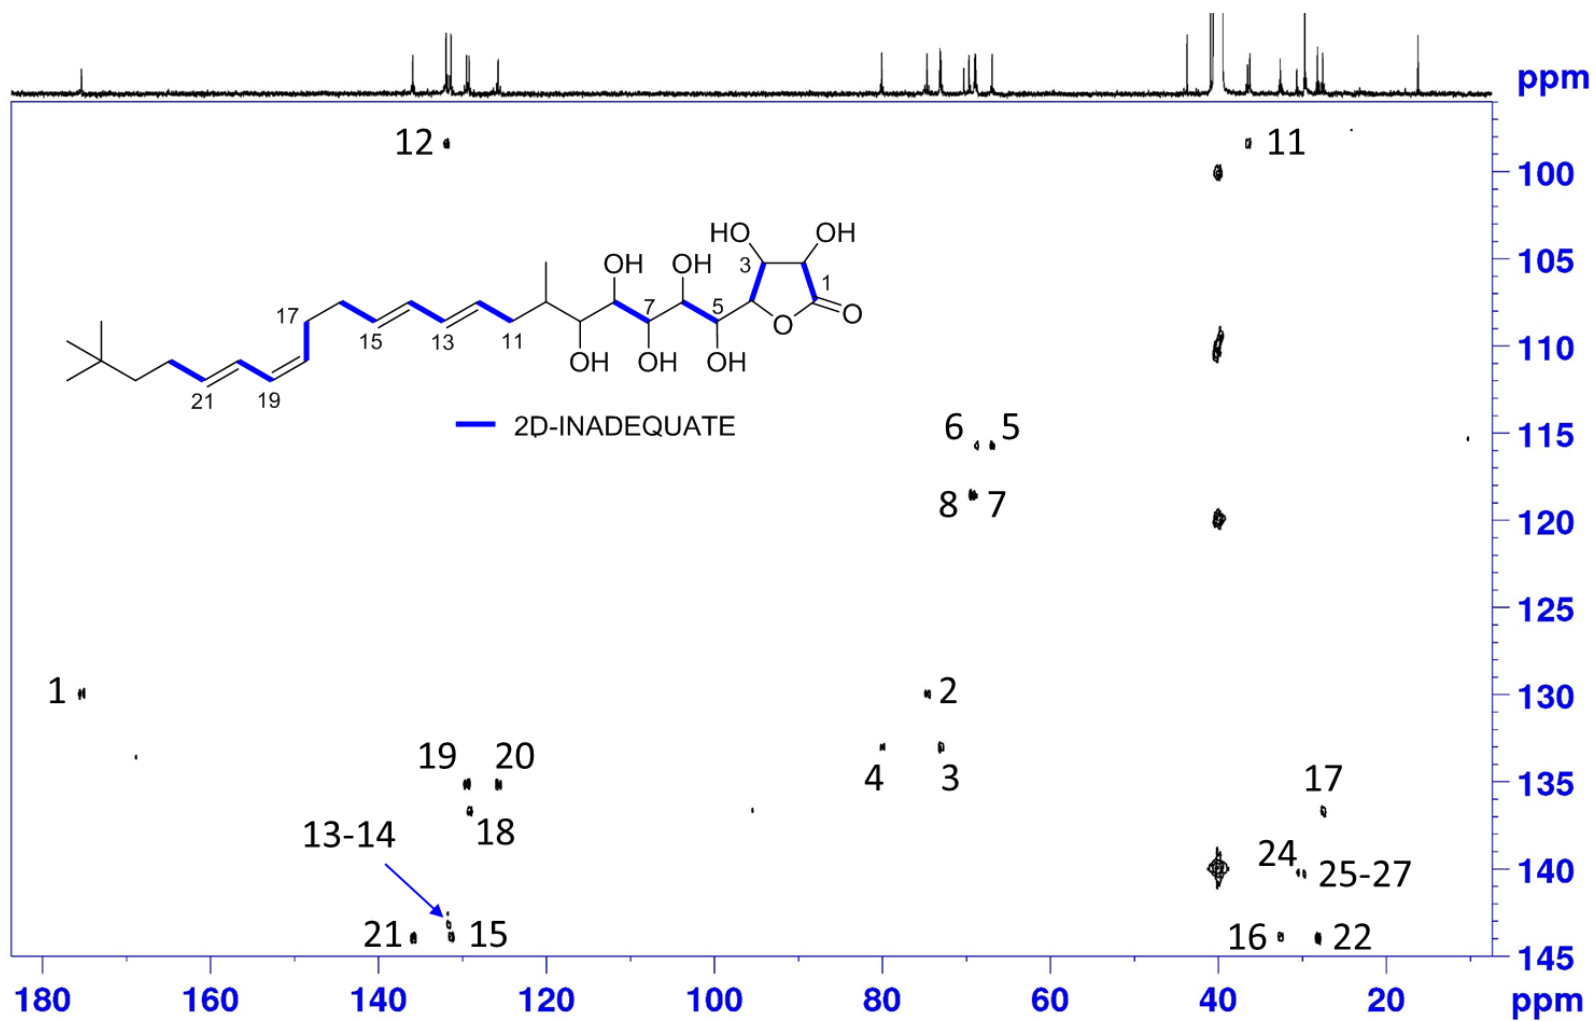

**Figure S5:**  $^{13}\text{C}$  NMR spectrum of **1** labeled with  $[1-^{13}\text{C}]$ propionate (125 MHz,  $\text{DMSO-}d_6$ )

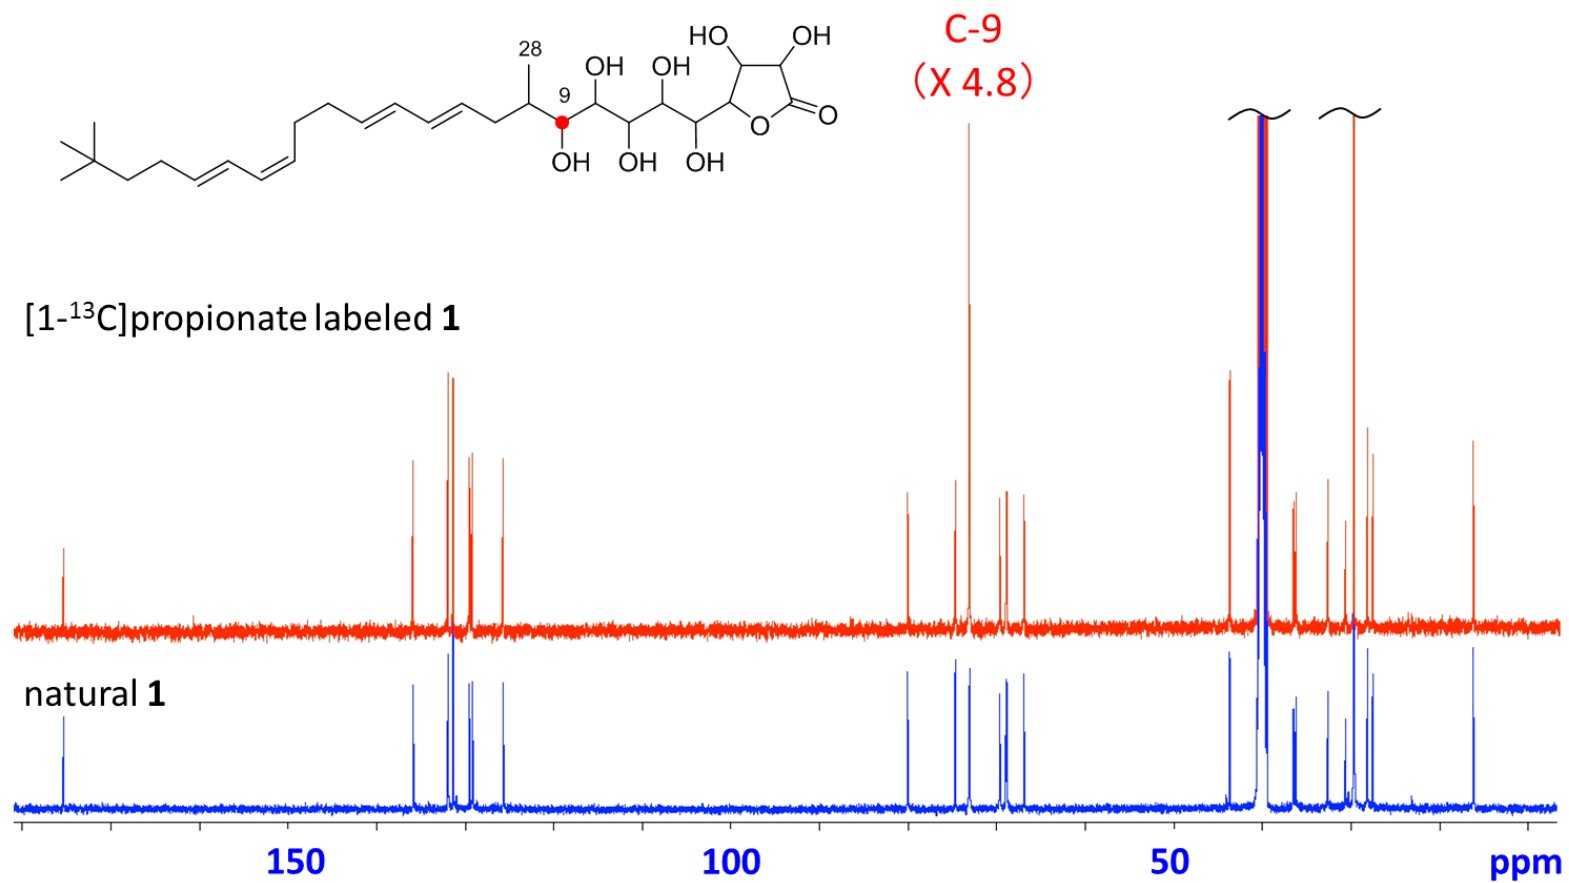

**Figure S6:**  $^{13}\text{C}$  NMR spectrum of **1** labeled with L-[methyl- $^{13}\text{C}$ ]methionine (125 MHz,  $\text{DMSO-}d_6$ )

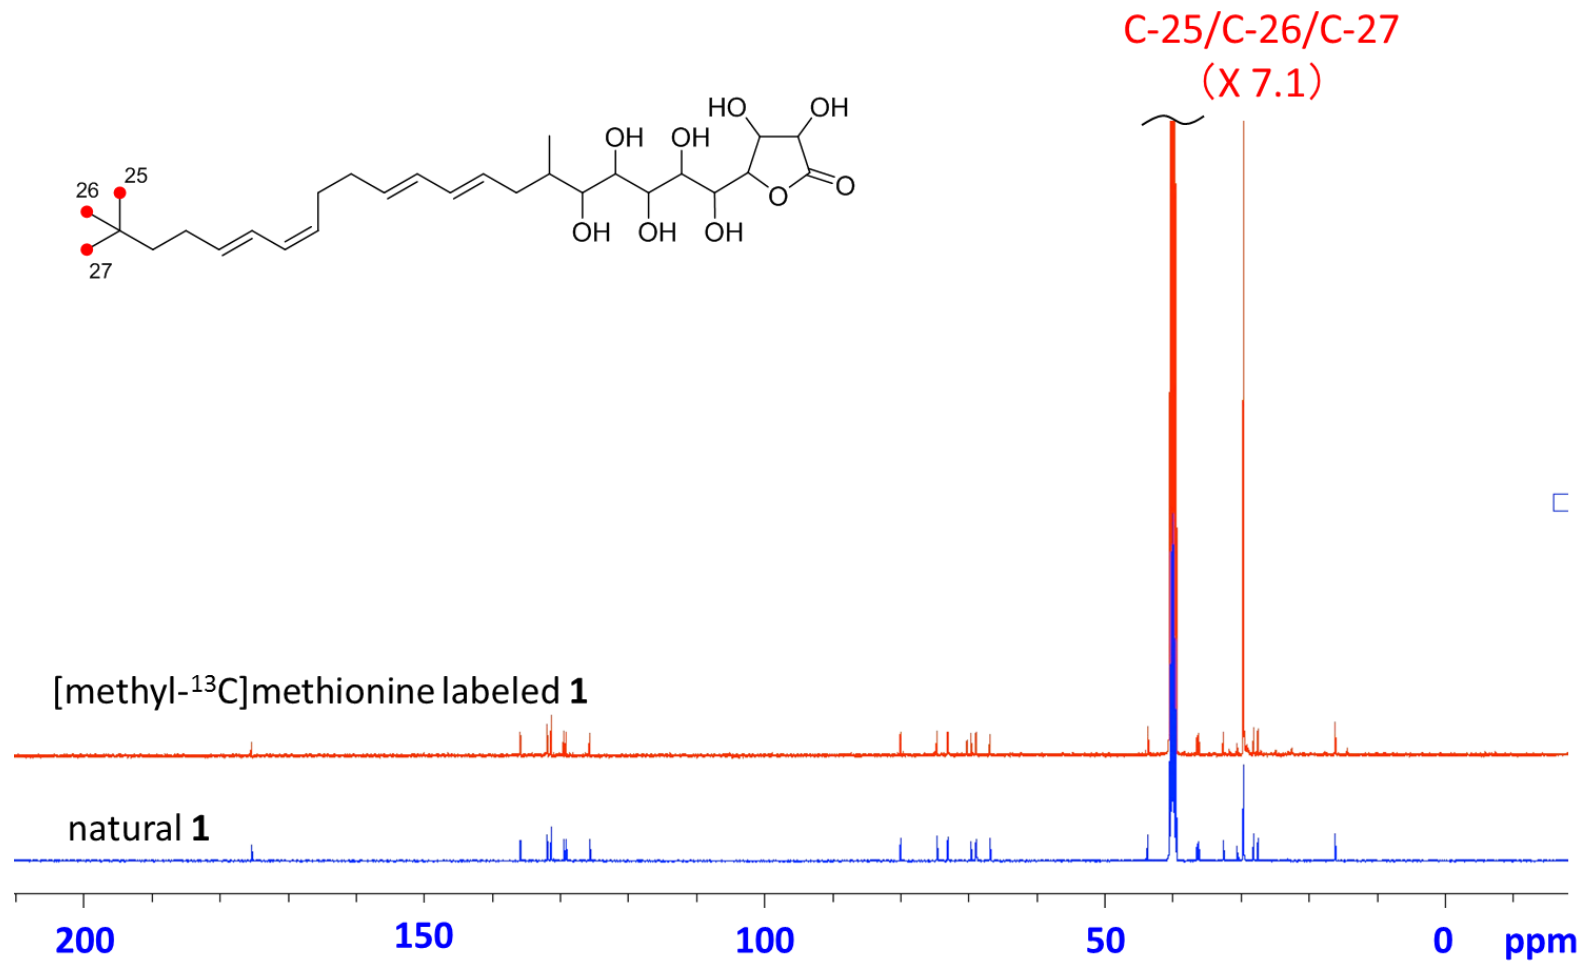

**Figure S7:**  $^1\text{H}$  NMR spectrum of **1** (500 MHz,  $\text{DMSO-}d_6$ )

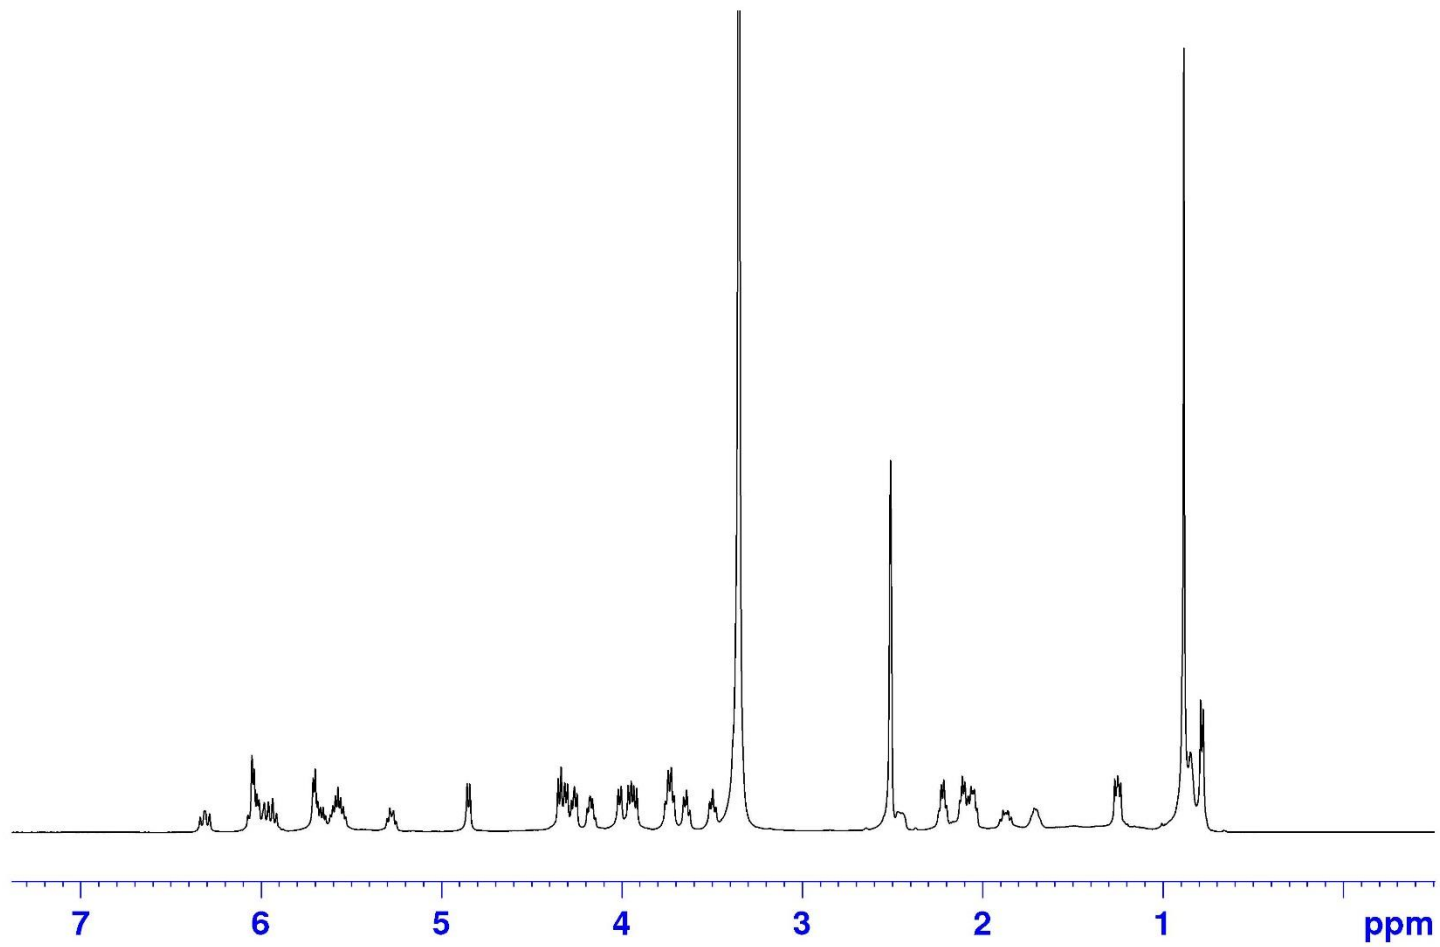



**Figure S8:** HRESITOFMS spectrum of **1**

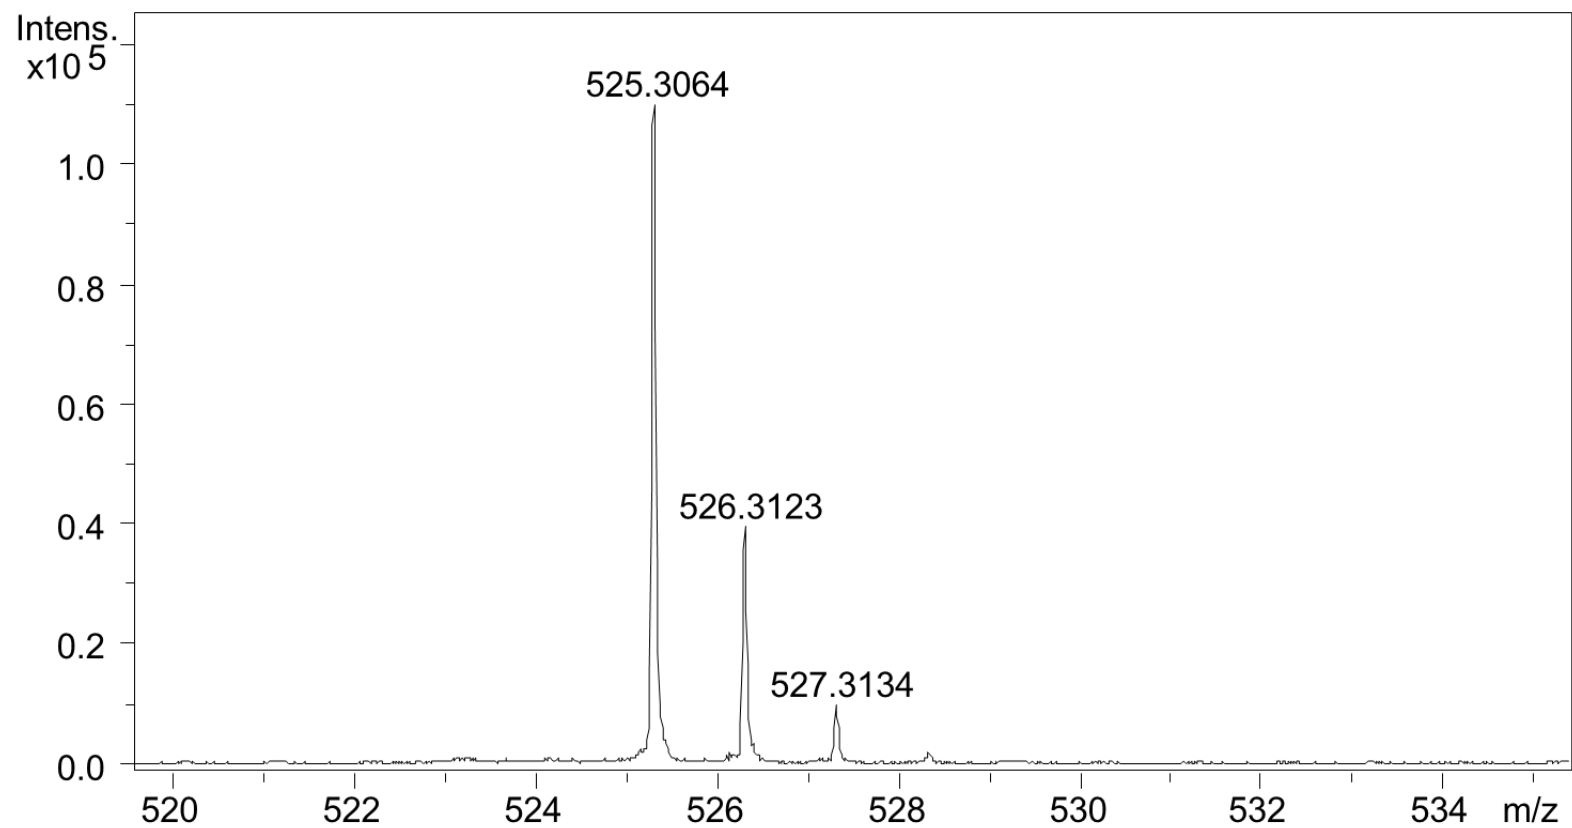

Supplement: Additional file 1 [file 1860-5397-13-47-S1.pdf]
